# Supplementary material for: Validation and Disease Risk Assessment of Previously Reported Genome-Wide Genetic Variants Associated With Brugada Syndrome: SADS-TW BrS Registry
Source: PubMed Central journal article supplement — Circ Genom Precis Med. 2020 Jun 3;13(4):e002797. doi: 10.1161/CIRCGEN.119.002797 (PMC7439932; doi:10.1161/circgen.119.002797), 2020-06-03
Supplement: hcg-13-e002797-s001.pdf [file hcg-13-e002797-s001.pdf]

## **SUPPLEMENTAL MATERIAL**

### **Methods**

#### **Patient population**

We consecutively recruited 190 unrelated patients with BrS (SADS-TW BrS registry)<sup>1</sup> from January 2000 to December 2016 in the Taiwanese population. Aborigines were excluded from this study. BrS was diagnosed by 2 independent cardiologists according to established criteria.<sup>2</sup> Demographic and clinical data, including age of onset, gender, clinical presentation, and family history of SCA or syncope, were recorded. In addition, the parameters of 12-lead ECGs, including heart rate, PR interval, QRS duration, QT interval, and QRS axis, were collected when patients were enrolled. Before enrolling patients with BrS, we ascertained that the SCA events were caused by ventricular fibrillation or polymorphic ventricular tachycardia which was successfully converted by an automated external defibrillator (AED) or direct current electrical shock. Syncope was defined as non-traumatic, abrupt, transient loss of consciousness with loss of awareness, characterized by amnesia for the period of unconsciousness, abnormal motor control, loss of responsiveness, a short duration, and spontaneous complete recovery. It was reported by patients and/or bystanders and was ascertained by blinded and independent certificated cardiologists through careful history taking, physical examinations, and laboratory tests (e.g. ECG, 24 hours Holter monitoring, head-up tilt testing, electrophysiological studies, blood tests, etc.). This study was approved by the local ethical committee of National Taiwan University Hospital, and all participants gave informed consent before participating.

#### **Datasets**

We used a genome-wide SNP dataset which contains a total of 648,629 SNPs and 16,171 samples from a Taiwanese cohort, of which 190 samples were BrS patients from the SADS-TW registry. The remaining 15,981 samples were healthy controls from the Taiwan Biobank (TWB) project.<sup>3</sup> All samples were genotyped using the Affymetrix Axiom Genome-wide TWB array version 1.0. In order to obtain the genotypes of SNPs that were not examined in this microarray platform, an imputation approach was applied in which a reference panel was used to infer missing genotypes from the target genotype dataset for each study sample. In this study, the 1000 Genomes phase 3 dataset<sup>4,5</sup> was used as the reference panel for imputation.

## Quality control

To achieve high-quality imputation results, two quality control filters for performing a GWAS were applied to the target genotype dataset with the goal of excluding both low quality SNPs and samples. To deal with both per-SNP and per-individual filtering, we used Plink1.9<sup>6</sup> to remove SNPs with call rates <95% and samples with missing rates >95%, which removed 24,604 SNPs. All 16,171 samples passed the quality control steps, suggesting the high quality of the genotype data. The target genotype array data also includes rare variants with minor allele frequency (MAF) <1% and SNPs in the common (>5%) and low (1-5%) MAF ranges. We excluded very rare SNPs by removing variants with MAF <0.01%, which resulted in 4,264 SNPs being removed. Lastly, the remaining 619,761 SNPs were analyzed based on a processing pipeline including SHAPEIT 2<sup>7</sup> followed by imputation with IMPUTE 2.0<sup>8</sup> (**Figure 1**).

## Candidate SNP selection, phasing, and imputation

The main objective in this study was to validate the 88 previously reported BrS- or ECG traits-associated SNPs<sup>9</sup> in Taiwanese BrS patients. For examples, these SNPs were in the following genes: *SCN5A*, *SCN10A*, *HEY2*, *NCOA7*, *HEATR5B*, *MEIS1*, *HAND1*, *SAP3OL*, *GJAI*, *FADS1*, *TBX3*, *TBX5*, *KLF12*, *MYH6*, and *KCNE*. The previously reported SNPs could be divided into 3 sets. The first set included the 3 most important SNPs previously associated with susceptibility to BrS and were included in the BrS-PRS: rs11708996 in *SCN5A*, rs10428132 in *SCN10A*, and rs9388451 near *HEY2*.<sup>9</sup> The second set included 12 SNPs reaching genome-wide significance in the GWAS from Dr. Bezzina et al. (rs6599240, rs11129801, rs9874633, rs10428132, rs7428167, rs10428168, rs12638572, rs7641844, rs7430439, and rs6599257 in *SCN10A*; rs1268070, rs9388451 in *HEY2/NCOA7*).<sup>9</sup> The third set included the 75 hit-SNPs associated with ECG traits identified from previous GWASs on ECG traits.<sup>9-18</sup> The list of SNPs in these 3 sets is shown in **Table S3**. The genotype calls from the microarrays were aligned to the forward strand, and the SHAPEIT2<sup>7</sup> algorithm was utilized to align alleles between the study samples and the reference panel, by inverting the alleles and/or the target set. Previous studies have demonstrated that the best strategy for imputing genotype data with IMPUTE2 is first to phase the study population with SHAPEIT2 and then impute the phased data with IMPUTE2.<sup>19, 20</sup> Therefore, samples analyzed in this study were compared with the 1000 Genomes phase 3 reference panel using SHAPEIT2, focusing on populations with East-Asian ancestry. The SHAPEIT2 algorithm iteratively updates each individual's haplotype estimation by conditioning upon the current haplotype estimates of all other individuals. The enormous amount of information present in the 1000 Genomes reference panel can be best exploited through phased haplotypes, which identify the SNPs that are co-located on the same

chromosome. The potential haplotypes are compared for each individual with all other observed haplotypes in the reference panel to impute missing genotypes using IMPUTE2 version 2.3.1 with default parameters. Imputation was performed by splitting the region of each of the chromosomes containing the gene of interest into 5 Mb chunks as recommended. The effective population size was set at 20,000 as recommended by the authors. To avoid margin effects while chunking genotypic regions, the IMPUTE2 algorithm uses an internal buffer region of 250 kb on either side of the analysis interval.

### **Single marker analysis and development of polygenic risk score models**

A single marker test was performed to determine whether a DNA variant was enriched in BrS patients, and logistic regression was utilized accordingly. Considering the genetic effect of one variant is usually not strong, a polygenic risk score (PRS) that summarizes the effects of all variants was developed. The odds ratio (OR) for each variant was calculated by using an additive model, and these ORs in all variants were integrated through their logarithm transformed values after being divided by standard errors. Notably, the log-ORs divided by standard errors were set as the weights for these developed PRS models in this study. For the set 2 SNPs, a linkage disequilibrium (LD) association was calculated because many of the SNPs were located in chromosome 3 led by *SCN5A*. If a SNP pair has a high correlation ( $R^2 > 0.7$ ), only the SNP showing lowest p-value between BrS patients and healthy controls was kept for further analyses. In addition, we performed a condition analysis for each SNP located in chromosome 3 by conditioning on the most significant SNP, rs6599257, and only the significant SNPs ( $P < 0.05$ ) were kept for further analyses. To stratify BrS patients, they were divided into two subgroups depending on whether they possessed a putative BrS1-associated variant in *SCN5A* or not. To determine the associations between the developed PRS models and three clinical outcomes (SCA, syncope, combined SCA and syncope) respectively, logistic regression models were utilized. Furthermore, we developed two weighting schemes by using the BrS patients with and without *SCN5A* variants versus healthy controls.

### **Statistical and survival analysis**

Either Chi-square or Fisher exact tests were used to compare categorical variables. Student's t-test was applied for continuous variables. All continuous data are expressed as mean  $\pm$  standard deviation and all categorical data are expressed as numbers and percentages. A two-

tailed *P*-value <0.05 was considered statistically significant. Statistical analysis was performed using SPSS Statistics for Windows, Version 22.0 (Armonk, NY: IBM Corp.). To remove the potential biases resulting from the left truncation and censoring of data, a Cox's proportional hazards model was utilized to evaluate the associations between a SNP and the 3 clinical outcomes (SCA, syncope, or both). The end date of this study date was set as December 31, 2018.

### **PCR and Sanger sequencing**

With permission from study subjects, 10 mL of peripheral venous blood was drawn for genetic analysis. We used a DNA extraction kit (Qiagen, Germany) to extract DNA from the buffy coat of patients' peripheral blood. PCR experiments were performed in a total reaction volume of 50  $\mu$ L, which contained 1  $\mu$ g of genomic DNA from patient samples and 2.0 mM  $Mg^{2+}$  when used at a 1X concentration. The final concentration of dNTPs was 200 $\mu$ M of each deoxynucleotide. Each primer was used at a final concentration of 0.5  $\mu$ M in the reaction. The concentration of Q5 Hot Start High-Fidelity DNA Polymerase in the 2X Master Mix has been optimized for best results under a wide range of conditions (New England BioLabs, USA). Conventional direct sequencing was performed on *SCN5A* using an ABI 3730 instrument (Applied Biosystems, Foster City, CA, USA). The candidate variants were classified as pathogenic or benign according to the definition of the American College of Medical Genetics and Genomics (ACMG).<sup>21</sup>

**Supplementary Table 1. The p-value of the conditional analysis of each individual SNP from set 2 versus rs10428132.**

| <b>CHR</b> | <b>SNP</b> | <b>P</b> |
|------------|------------|----------|
| <b>3</b>   | rs6599240  | 0.4554   |
| <b>3</b>   | rs11129801 | 0.0373*  |
| <b>3</b>   | rs9874633  | 0.1876   |
| <b>3</b>   | rs7428167  | 0.0305*  |
| <b>3</b>   | rs10428168 | 0.0154*  |
| <b>3</b>   | rs7641844  | 0.0177*  |
| <b>3</b>   | rs7430439  | 0.0363*  |
| <b>3</b>   | rs6599257  | 0.0515   |
| <b>6</b>   | rs1268070  | 0.0233*  |
| <b>6</b>   | rs9388451  | 0.0009*  |

\* indicates statistical significance ( $p < 0.05$ ).

**Supplementary Table 2. The odds ratios from the PRS models generated using the 3 sets of SNPs individually**

| <b>Set 1 SNPs</b> | <b><i>SCN5A</i> mutation-negative</b> | <b><i>SCN5A</i> mutation-positive</b> |
|-------------------|---------------------------------------|---------------------------------------|
| <b>PRS range</b>  |                                       |                                       |
| <b>0%-20%*</b>    | 1                                     | 1                                     |
| 21%-40%           | 0.12 (0.03-0.38) <sup>‡</sup>         | 0.4 (0.08-2.06)                       |
| 41%-60%           | 2.27 (1.43-3.61) <sup>‡</sup>         | 1.2 (0.37-3.93)                       |
| 61%-80%           | 1.92 (1.19-3.1) <sup>‡</sup>          | 2.6 (0.93-7.3)                        |
| 81%-100%          | 0.85 (0.48-1.5)                       | 0.4 (0.08-2.06)                       |
| <b>Set 2 SNPs</b> |                                       |                                       |
| <b>PRS range</b>  |                                       |                                       |
| <b>0%-20%*</b>    | 1                                     | 1                                     |
| 21%-40%           | 1.57 (0.8-3.08)                       | 1.33 (0.3-5.96)                       |
| 41%-60%           | 2.50 (1.34-4.66) <sup>‡</sup>         | 0.67 (0.11-3.99)                      |
| 61%-80%           | 2.00 (1.05-3.81) <sup>‡</sup>         | 1.67 (0.4-6.98)                       |
| 81%-100%          | 3.36 (1.84-6.11) <sup>‡</sup>         | 3.67 (1.02-13.16) <sup>‡</sup>        |
| <b>Set 3 SNPs</b> |                                       |                                       |
| <b>PRS range</b>  |                                       |                                       |
| <b>0%-20%*</b>    | 1                                     | 1                                     |
| 21%-40%           | 3.25 (1.06-10.03) <sup>‡</sup>        | 3 (0.6-14.94)                         |
| 41%-60%           | 4.50 (1.52-13.37) <sup>‡</sup>        | 2 (0.37-10.96)                        |
| 61%-80%           | 9.26 (3.28-26.13) <sup>‡</sup>        | 3 (0.6-14.94)                         |
| 81%-100%          | 14.5 (5.24-40.16) <sup>‡</sup>        | 2.5 (0.48-12.93)                      |

PRS: polygenic risk score; SNP: single nucleotide polymorphism

\* Here showed the raw odds ratios. In order to make the axis symmetrical in **Figure 4**, we showed the ORs on a log scale in **Figure 4**.

<sup>†</sup> Reference group

<sup>‡</sup> indicates statistical significance ( $p < 0.05$ ).

**Supplementary Table 3. List of the 88 previously reported SNPs that were associated with BrS or reaching genome-wide significance or associated with ECG traits**

| Cause susceptibility to BrS (set 1) | Gene or nearest gene | Reaching genome-wide significance in the GWAS (set 2) | Gene or nearest gene | SNPs previously associated with ECG traits (set 3) | Gene or nearest gene                         |
|-------------------------------------|----------------------|-------------------------------------------------------|----------------------|----------------------------------------------------|----------------------------------------------|
| rs11708996                          | <i>SCN5A</i>         | rs6599240                                             | <i>SCN10A</i>        | rs846111                                           | <i>RNF207,NPHP4,CHDS,ACOT7,PLEKKG5,KLH20</i> |
| rs10428132                          | <i>SCN10A</i>        | rs11129801                                            | <i>SCN10A</i>        | rs9436640                                          | <i>NFIA</i>                                  |
| rs9388451                           | <i>HEY2, NCOA7</i>   | rs9874633                                             | <i>SCN10A</i>        | rs4074536                                          | <i>CASQ2</i>                                 |
|                                     |                      | rs10428132                                            | <i>SCN10A</i>        | rs2880058                                          | <i>NOS1AP</i>                                |
|                                     |                      | rs7428167                                             | <i>SCN10A</i>        | rs12143842                                         | <i>NOS1AP</i>                                |
|                                     |                      | rs10428168                                            | <i>SCN10A</i>        | rs10494366                                         | <i>NOS1AP</i>                                |
|                                     |                      | rs12638572                                            | <i>SCN10A</i>        | rs16857031                                         | <i>NOS1AP</i>                                |
|                                     |                      | rs7641844                                             | <i>SCN10A</i>        | rs12029454                                         | <i>NOS1AP</i>                                |
|                                     |                      | rs7430439                                             | <i>SCN10A</i>        | rs4657178                                          | <i>NOS1AP</i>                                |
|                                     |                      | rs6599257                                             | <i>SCN10A</i>        | rs10919071                                         | <i>ATP1B1</i>                                |
|                                     |                      | rs1268070                                             | <i>HEY2</i>          | rs12731740                                         | <i>CD46,CD34,PLXNA2PLXNA2</i>                |
|                                     |                      | rs9388451                                             | <i>HEY2, NCOA7</i>   | rs2745967                                          | <i>CD34</i>                                  |
|                                     |                      |                                                       |                      | rs17391905                                         | <i>C1orf185,RNF11,CDKN2C,FAF1</i>            |
|                                     |                      |                                                       |                      | rs7562790                                          | <i>CRIM1</i>                                 |
|                                     |                      |                                                       |                      | rs17020136                                         | <i>HEATR5B,STRN</i>                          |
|                                     |                      |                                                       |                      | rs10865355                                         | <i>MEIS1</i>                                 |
|                                     |                      |                                                       |                      | rs11897119                                         | <i>MEIS1</i>                                 |
|                                     |                      |                                                       |                      | rs2051211                                          | <i>SCN5A,SCN10A</i>                          |
|                                     |                      |                                                       |                      | rs10865879                                         | <i>SCN5A,SCN10A</i>                          |
|                                     |                      |                                                       |                      | rs11129795                                         | <i>SCN5A,SCN10A</i>                          |
|                                     |                      |                                                       |                      | rs12053903                                         | <i>SCN5A</i>                                 |
|                                     |                      |                                                       |                      | rs3922844                                          | <i>SCN5A,SCN10A</i>                          |
|                                     |                      |                                                       |                      | rs11708996                                         | <i>SCN5A,SCN10A</i>                          |

---

|            |                                               |
|------------|-----------------------------------------------|
| rs6599222  | <i>SCN5A,SCN10A</i>                           |
| rs11710077 | <i>SCN5A,SCN10A</i>                           |
| rs9851724  | <i>SCN5A,SCN10A</i>                           |
| rs6795970  | <i>SCN5A,SCN10A</i>                           |
| rs6798015  | <i>SCN5A,SCN10A</i>                           |
| rs7627552  | <i>SCN5A,SCN10A</i>                           |
| rs4687718  | <i>TKT</i>                                    |
| rs2242285  | <i>LRIG-SLC25A26</i>                          |
| rs7660702  | <i>ARHGAP24</i>                               |
| rs13165478 | <i>HAND1,SAP30L</i>                           |
| rs251253   | <i>C5orf41,NKX2.5</i>                         |
| rs1321311  | <i>PI16,CDKN1A</i>                            |
| rs281868   | <i>C6orf204,SLC35F1,PLN,BRD7P3,AS<br/>F1A</i> |
| rs11153730 | <i>C6orf204,SLC35F1,PLN,BRD7P3,AS<br/>F1A</i> |
| rs11970286 | <i>C6orf204,SLC35F1,PLN,BRD7P3,AS<br/>F1A</i> |
| rs12210810 | <i>C6orf204,SLC35F1,PLN,BRD7P3,AS<br/>F1A</i> |
| rs11154022 | <i>GJA1</i>                                   |
| rs9398652  | <i>GJA1</i>                                   |
| rs1362212  | <i>TBX20</i>                                  |
| rs7784776  | <i>IGFBP3</i>                                 |
| rs314370   | <i>SLC12A9,UFSP1</i>                          |
| rs3807989  | <i>CAV1/CAV2</i>                              |
| rs2968863  | <i>KCNH2</i>                                  |
| rs4725982  | <i>KCNH2</i>                                  |
| rs1733724  | <i>DKK2</i>                                   |
| rs7342028  | <i>VTIIA</i>                                  |
| rs2074238  | <i>KCNQ1</i>                                  |
| rs12296050 | <i>KCNQ1</i>                                  |
| rs12576239 | <i>KCNQ1</i>                                  |

---



---

|            |                                               |
|------------|-----------------------------------------------|
| rs174547   | <i>FADS1</i>                                  |
| rs4944092  | <i>WNT11</i>                                  |
| rs17287293 | <i>SOX5,BCAT1</i>                             |
| rs11047543 | <i>SOX5,BCAT1</i>                             |
| rs883079   | <i>TBX3,TBX5</i>                              |
| rs3825214  | <i>TBX5</i>                                   |
| rs7312625  | <i>TBX3,TBX5</i>                              |
| rs1896312  | <i>TBX3,TBX5</i>                              |
| rs10850409 | <i>TBX3,TBX5</i>                              |
| rs885389   | <i>GPR133</i>                                 |
| rs2478333  | <i>TBX3,TBX5</i>                              |
| rs1886512  | <i>SUCLA2</i>                                 |
| rs365990   | <i>KLF12</i>                                  |
| rs223116   | <i>MYH6,MYH7,NDNG,ZFHX2</i>                   |
| rs11848785 | <i>MYH6,MYH7,NDNG,ZFHX2</i>                   |
| rs8049607  | <i>SIPA1L1</i>                                |
| rs37062    | <i>LITAF,CLEC16A,SNN,ZC3H7A,TNF<br/>RSF16</i> |
| rs2074518  | <i>CNOT1,GINS3,SLC38A7,GOT1</i>               |
| rs17608766 | <i>LIG3,RFFL</i>                              |
| rs9912468  | <i>GOSR2</i>                                  |
| rs17779747 | <i>PRKCA</i>                                  |
| rs991014   | <i>KCNJ2</i>                                  |
| rs1805128  | <i>SETBP1</i>                                 |

---

BrS: Brugada syndrome, SNP: single nucleotide polymorphism, ECG: electrocardiogram, GWAS: genome-wide association study

**Supplementary Table 4. The associations between single SNP and composite clinical outcomes (SCA plus syncope).**

| SNP_ID           | SCN5A mutation-  |                | SCN5A mutation+     |                | All BrS patients |                |
|------------------|------------------|----------------|---------------------|----------------|------------------|----------------|
|                  | HR (95% CI)      | <i>P</i> value | HR (95% CI)         | <i>P</i> value | HR (95% CI)      | <i>P</i> value |
| <b>rs4687718</b> | 1.95 (0.98-3.86) | 0.057          | 12.99 (1.18-143.31) | 0.036*         | 2.13 (1.11-4.08) | 0.022*         |
| <b>rs7784776</b> | 1.54 (1.14-2.07) | 0.005*         | 1.15 (0.44-2.99)    | 0.771          | 1.48 (1.12-1.96) | 0.006*         |
| <b>rs2968863</b> | 0.50 (0.23-1.07) | 0.075          | 0.28 (0.07-1.06)    | 0.061          | 0.41 (0.21-0.79) | 0.008*         |

CI: confidence interval; HR: hazard ratio; SCA: sudden cardiac arrest; *P*<0.05 is highlighted in red color

\* indicates statistical significance ( $p < 0.05$ ).

**Supplementary Table 5. Significant SNPs in the primary Taiwanese BrS-Control GWAS.**

| SNP        | Chromosome | Location  | Major allele | Minor allele | P-value   |
|------------|------------|-----------|--------------|--------------|-----------|
| rs78412897 | 1          | 165186203 | C            | A            | 6.90E-32  |
| rs9842169  | 3          | 77714832  | G            | A            | 1.60E-10  |
| rs77867179 | 4          | 168402906 | C            | T            | 8.58E-48  |
| rs77739912 | 5          | 42366688  | G            | A            | 5.97E-32  |
| rs1360590  | 9          | 22041443  | C            | T            | 6.76E-12  |
| rs1828774  | 15         | 29013164  | G            | A            | 3.41E-125 |
| rs9925311  | 16         | 53767648  | G            | A            | 6.85E-20  |
| rs162400   | 21         | 44950305  | C            | A            | 9.65E-18  |

Supplementary Table 6. Validation of the 88 previously reported SNPs in the Taiwanese BrS patients

|                                                                               | Chr. Position<br>(Build 37) | Gene or nearest<br>gene                           | Risk<br>allele | Protective<br>allele | RAF<br>(case/control)<br>in Taiwanese | RAF<br>(case/control)<br>in Caucasian | All BrS patients in Taiwan<br>vs. Healthy controls |                        |
|-------------------------------------------------------------------------------|-----------------------------|---------------------------------------------------|----------------|----------------------|---------------------------------------|---------------------------------------|----------------------------------------------------|------------------------|
| <b>SNPs causing susceptibility to Brugada syndrome<sup>9</sup> (set 1)</b>    |                             |                                                   |                |                      |                                       |                                       | <b><i>P</i> value<sup>*</sup></b>                  | <b>Odds ratio</b>      |
| rs11708996                                                                    | Chr3:38633923               | <i>SCN5A</i>                                      | C              | G                    | 0.011/0.007                           | 0.23/0.15                             | 4.27E-01                                           | 1.5 (0.46-3.57)        |
| rs10428132                                                                    | Chr3:38777554               | <i>SCN10A</i>                                     | T              | G                    | 0.305/0.193                           | 0.69/0.41                             | 5.92E-08 <sup>‡</sup>                              | 1.84 (1.47-2.29)       |
| rs9388451                                                                     | Chr6:126090377              | <i>HEY2, NCOA7</i>                                | C              | T                    | 0.818/0.742                           | 0.65/0.50                             | 7.94E-04 <sup>‡</sup>                              | 1.56 (1.21-2.05)       |
| <b>SNPs reaching genome-wide significance in the GWAS<sup>9</sup> (set 2)</b> |                             |                                                   |                |                      |                                       |                                       |                                                    |                        |
| rs6599240                                                                     | Chr3:38738717               | <i>SCN10A</i>                                     | A              | G                    | 0.195/0.138                           | NA/0.435                              | 1.65E-03 <sup>‡</sup>                              | 1.51 (1.16-1.94)       |
| rs11129801                                                                    | Chr3:38750375               | <i>SCN10A</i>                                     | G              | A                    | 0.645/0.535                           | NA/0.72                               | 8.91E-06 <sup>‡</sup>                              | 1.56 (1.28-1.89)       |
| rs9874633                                                                     | Chr3:38771994               | <i>SCN10A</i>                                     | A              | G                    | 0.789/0.784                           | NA/NA                                 | 9.94E-01                                           | 1 (0.79-1.28)          |
| rs10428132                                                                    | Chr3:38777554               | <i>SCN10A</i>                                     | T              | G                    | 0.305/0.193                           | NA/NA                                 | 5.92E-08 <sup>‡</sup>                              | 1.84 (1.47-2.29)       |
| rs7428167                                                                     | Chr3:38778191               | <i>SCN10A</i>                                     | T              | C                    | 0.521/0.396                           | NA/NA                                 | 1.08E-06 <sup>‡</sup>                              | 1.66 (1.35-2.03)       |
| rs10428168                                                                    | Chr3:38780059               | <i>SCN10A</i>                                     | T              | C                    | 0.663/0.669                           | NA/NA                                 | 8.08E-01                                           | 0.97 (0.79-1.21)       |
| rs12638572                                                                    | Chr3:38787797               | <i>SCN10A</i>                                     | A              | G                    | 0.318/0.205                           | NA/NA                                 | 9.04E-08 <sup>‡</sup>                              | 1.81 (1.45-2.25)       |
| rs7641844                                                                     | Chr3:38802251               | <i>SCN10A</i>                                     | A              | G                    | 0.447/0.318                           | NA/NA                                 | 1.05E-07 <sup>‡</sup>                              | 1.74 (1.42-2.13)       |
| rs7430439                                                                     | Chr3:38803639               | <i>SCN10A</i>                                     | G              | A                    | 0.418/0.294                           | NA/NA                                 | 1.91E-07 <sup>‡</sup>                              | 1.73 (1.4-2.12)        |
| rs6599257                                                                     | Chr3:38804588               | <i>SCN10A</i>                                     | C              | T                    | 0.226/0.13                            | NA/NA                                 | 4.78E-08 <sup>‡</sup>                              | 1.97 (1.54-2.5)        |
| rs1268070                                                                     | Chr6:126041164              | <i>HEY2</i>                                       | C              | T                    | 0.853/0.804                           | NA/NA                                 | 3.79E-02 <sup>‡</sup>                              | 1.33 (1.02-1.75)       |
| rs9388451                                                                     | Chr6:126090377              | <i>HEY2, NCOA7</i>                                | C              | T                    | 0.818/0.742                           | NA/0.49                               | 7.94E-04 <sup>‡</sup>                              | 1.56 (1.21-2.05)       |
| <b>SNPs previously associated with ECG traits<sup>10-18, 22</sup> (set 3)</b> |                             |                                                   |                |                      |                                       |                                       |                                                    |                        |
| rs846111                                                                      | Chr1:6279370                | <i>RNF207, NPHP4, CHDS, ACOT7, PLEKHG5, KLH20</i> | G              | C                    | 0.824/0.835                           | 0.253/0.268                           | 4.23E-01                                           | 0.9 (0.7-1.17)         |
| rs9436640                                                                     | Chr1:61873677               | <i>NFIA</i>                                       | T              | G                    | 1/1                                   | 0.468/0.448                           | 9.76E-01                                           | NA(0-Inf) <sup>†</sup> |
| rs4074536                                                                     | Chr1:116310967              | <i>CASQ2</i>                                      | T              | C                    | 0.524/0.517                           | 0.309/0.290                           | 8.65E-01                                           | 1.02 (0.83-1.24)       |
| rs2880058                                                                     | Chr1:162014632              | <i>NOS1AP</i>                                     | A              | G                    | 0/0                                   | 0.358/0.337                           | NA                                                 | NA(0-Inf) <sup>†</sup> |
| rs12143842                                                                    | Chr1:162033890              | <i>NOS1AP</i>                                     | C              | T                    | 0/0                                   | 0.274/0.254                           | NA                                                 | NA(0-Inf) <sup>†</sup> |
| rs10494366                                                                    | Chr1:162085685              | <i>NOS1AP</i>                                     | G              | T                    | 0/0                                   | 0.399/0.365                           | NA                                                 | NA(0-Inf) <sup>†</sup> |
| rs16857031                                                                    | Chr1:162112910              | <i>NOS1AP</i>                                     | C              | G                    | 0/0                                   | 0.146/0.145                           | NA                                                 | NA(0-Inf) <sup>†</sup> |

|            |                |                                   |   |   |             |             |                       |                        |
|------------|----------------|-----------------------------------|---|---|-------------|-------------|-----------------------|------------------------|
| rs12029454 | Chr1:162133117 | <i>NOS1AP</i>                     | G | A | 0.231/0.217 | 0.176/0.165 | 5.46E-01              | 1.08 (0.84-1.36)       |
| rs4657178  | Chr1:162210610 | <i>NOS1AP</i>                     | C | T | 0/0         | 0.272/0.275 | NA                    | NA(0-Inf) <sup>†</sup> |
| rs10919071 | Chr1:169099483 | <i>ATP1B1</i>                     | A | G | 0/0         | 0.109/0.138 | NA                    | NA(0-Inf) <sup>†</sup> |
| rs12731740 | Chr1:208024820 | <i>CD46,CD34,PLXNA2</i>           | C | T | 0/0         | 0.115/0.101 | NA                    | NA(0-Inf) <sup>†</sup> |
| rs2745967  | Chr1:208128722 | <i>CD34</i>                       | G | A | 0/0         | 0.372/0.371 | NA                    | NA(0-Inf) <sup>†</sup> |
| rs17391905 | Chr1:51546140  | <i>C1orf185,RNF11,CDKN2C,FAF1</i> | G | A | 0.079/0.059 | NA/NA       | 1.08E-01              | 1.36 (0.92-1.95)       |
| rs7562790  | Chr2:36673555  | <i>CRIM1</i>                      | T | G | 0.379/0.378 | 0.396/0.406 | 9.57E-01              | 1.01 (0.81-1.24)       |
| rs17020136 | Chr2:37248015  | <i>HEATR5B,STRN</i>               | T | C | 0.443/0.509 | 0.213/0.182 | 7.36E-03 <sup>‡</sup> | 0.76 (0.62-0.93)       |
| rs10865355 | Chr2:66764997  | <i>MEIS1</i>                      | A | G | 0.221/0.174 | 0.402/0.377 | 1.62E-02 <sup>‡</sup> | 1.35 (1.05-1.72)       |
| rs11897119 | Chr2:66772000  | <i>MEIS1</i>                      | T | C | 0.779/0.825 | 0.401/0.377 | 1.14E-02 <sup>‡</sup> | 0.73 (0.58-0.94)       |
| rs2051211  | Chr3:38559749  | <i>SCN5A,SCN10A</i>               | A | G | 0.739/0.699 | 0.217/0.255 | 8.97E-02              | 1.22 (0.97-1.54)       |
| rs10865879 | Chr3:38577362  | <i>SCN5A,SCN10A</i>               | A | C | 0.931/0.91  | 0.282/0.233 | 9.40E-02              | 1.37 (0.97-2.04)       |
| rs11129795 | Chr3:38589163  | <i>SCN5A,SCN10A</i>               | G | A | 0.932/0.91  | 0.284/0.233 | 1.77E-17 <sup>‡</sup> | 3.89 (2.91-5.46)       |
| rs12053903 | Chr3:38593393  | <i>SCN5A</i>                      | T | C | 0.437/0.455 | 0.394/0.327 | 5.00E-01              | 0.93 (0.76-1.14)       |
| rs3922844  | Chr3:38624253  | <i>SCN5A,SCN10A</i>               | T | C | 0.087/0.099 | 0.233/0.298 | 9.86E-01              | 1 (0.69-1.4)           |
| rs11708996 | Chr3:38633923  | <i>SCN5A,SCN10A</i>               | G | C | 0.987/0.992 | 0.228/0.151 | 9.25E-02              | 0.56 (0.31-1.23)       |
| rs6599222  | Chr3:38648062  | <i>SCN5A,SCN10A</i>               | C | T | 0/0.002     | 0.286/0.218 | 9.67E-01              | 0 (0-0.41)             |
| rs11710077 | Chr3:38657899  | <i>SCN5A,SCN10A</i>               | A | T | 0.947/0.937 | 0.166/0.197 | 4.03E-01              | 1.21 (0.79-1.96)       |
| rs9851724  | Chr3:38719935  | <i>SCN5A,SCN10A</i>               | C | T | 0.255/0.244 | 0.226/0.307 | 5.88E-01              | 1.07 (0.84-1.34)       |
| rs6795970  | Chr3:38766675  | <i>SCN5A,SCN10A</i>               | A | G | 0.263/0.152 | 0.668/0.410 | 5.10E-09 <sup>‡</sup> | 1.98 (1.57-2.49)       |
| rs6798015  | Chr3:38798836  | <i>SCN5A,SCN10A</i>               | C | T | 0.315/0.194 | 0.607/0.364 | 3.96E-09 <sup>‡</sup> | 1.92 (1.54-2.39)       |
| rs7627552  | Chr3:38666036  | <i>SCN5A,SCN10A</i>               | - | G | 0/0         | NA/NA       | NA                    | NA(0-Inf) <sup>†</sup> |
| rs4687718  | Chr3:53282303  | <i>TKT</i>                        | A | G | 0.029/0.036 | 0.120/0.118 | 4.47E-01              | 0.79 (0.41-1.37)       |
| rs2242285  | Chr3:66431602  | <i>LRIG-SLC25A26</i>              | A | G | 0.171/0.166 | 0.436/0.400 | 8.02E-01              | 1.04 (0.78-1.34)       |
| rs7660702  | Chr4:86651464  | <i>ARHGAP24</i>                   | T | C | 0.074/0.081 | 0.277/0.303 | 6.35E-01              | 0.91 (0.61-1.31)       |
| rs13165478 | Chr5:153869040 | <i>HAND1,SAP30L</i>               | G | A | 0.607/0.593 | 0.339/0.380 | 5.84E-01              | 1.06 (0.86-1.3)        |
| rs251253   | Chr5:172480336 | <i>C5orf41,NKX2.5</i>             | C | T | 0.813/0.817 | 0.438/0.377 | 9.05E-01              | 0.98 (0.76-1.28)       |

|            |                 |                                          |   |   |             |             |                       |                        |
|------------|-----------------|------------------------------------------|---|---|-------------|-------------|-----------------------|------------------------|
| rs1321311  | Chr6:36622900   | <i>PII6,CDKN1A</i>                       | C | A | 0.811/0.839 | 0.267/0.248 | 1.45E-01              | 0.82 (0.64-1.08)       |
| rs281868   | Chr6:118574061  | <i>C6orf204,SLC35F1,PLN,BRD7P3,ASF1A</i> | G | A | 0.758/0.72  | 0.478/0.490 | 9.53E-02              | 1.22 (0.97-1.56)       |
| rs11153730 | Chr6:118667522  | <i>C6orf204,SLC35F1,PLN,BRD7P3,ASF1A</i> | T | C | 0/0         | 0.470/0.463 | NA                    | NA(0-Inf) <sup>†</sup> |
| rs11970286 | Chr6:118680374  | <i>C6orf204,SLC35F1,PLN,BRD7P3,ASF1A</i> | C | T | 0.247/0.258 | 0.427/0.422 | 6.72E-01              | 0.95 (0.75-1.2)        |
| rs12210810 | Chr6:118653204  | <i>C6orf204,SLC35F1,PLN,BRD7P3,ASF1A</i> | T | C | 0.262/0.27  | NA/NA       | 2.08E-01              | 1.16 (0.92-1.44)       |
| rs11154022 | Chr6:121748542  | <i>GJA1</i>                              | A | G | 0.537/0.49  | 0.337/0.339 | 6.22E-02              | 1.21 (0.99-1.49)       |
| rs9398652  | Chr6:122146034  | <i>GJA1</i>                              | C | A | 0.526/0.539 | 0.085/0.099 | 6.50E-01              | 0.95 (0.78-1.17)       |
| rs1362212  | Chr7:35305306   | <i>TBX20</i>                             | G | A | 0.929/0.923 | 0.226/0.182 | 6.02E-01              | 1.11 (0.77-1.68)       |
| rs7784776  | Chr7:46620145   | <i>IGFBP3</i>                            | A | G | 0.229/0.243 | 0.430/0.420 | 5.26E-01              | 0.93 (0.72-1.17)       |
| rs314370   | Chr7:100453208  | <i>SLC12A9,UFSP1</i>                     | T | C | 0.928/0.955 | 0.176/0.189 | 2.65E-09 <sup>‡</sup> | 2.33 (1.8-3.15)        |
| rs3807989  | Chr7:116186241  | <i>CAV1/CAV2</i>                         | A | G | 0.263/0.248 | 0.471/0.401 | 4.87E-01              | 1.09 (0.86-1.36)       |
| rs2968863  | Chr7:150623137  | <i>KCNH2</i>                             | C | T | 0.974/0.964 | 0.245/0.277 | 2.84E-01              | 1.41 (0.8-2.82)        |
| rs4725982  | Chr7:150637863  | <i>KCNH2</i>                             | C | T | 0.352/0.373 | 0.221/0.204 | 3.76E-01              | 0.91 (0.73-1.12)       |
| rs1733724  | Chr10:54223977  | <i>DKK2</i>                              | A | G | 0.053/0.051 | 0.260/0.238 | 8.73E-01              | 1.04 (0.64-1.6)        |
| rs7342028  | Chr10:114479262 | <i>VTG1A</i>                             | G | T | 0.405/0.461 | 0.260/0.277 | 3.56E-02 <sup>‡</sup> | 0.8 (0.65-0.98)        |
| rs2074238  | Chr11:2484803   | <i>KCNQ1</i>                             | T | C | 0.024/0.026 | 0.093/0.079 | 9.58E-01              | 1.02 (0.48-1.88)       |
| rs12296050 | Chr11:2489342   | <i>KCNQ1</i>                             | C | T | 0.7/0.652   | 0.180/0.196 | 5.07E-02              | 1.24 (1-1.56)          |
| rs12576239 | Chr11:2502319   | <i>KCNQ1</i>                             | C | T | 0.916/0.899 | 0.124/0.134 | 2.45E-01              | 1.24 (0.88-1.81)       |
| rs174547   | Chr11:61570783  | <i>FADS1</i>                             | T | C | 0.45/0.411  | 0.329/0.305 | 1.30E-01              | 1.17 (0.95-1.43)       |
| rs4944092  | Chr11:75909619  | <i>WNT11</i>                             | A | G | 0.766/0.771 | 0.291/0.307 | 8.52E-01              | 0.98 (0.77-1.25)       |
| rs17287293 | Chr12:24770878  | <i>SOX5,BCAT1</i>                        | A | G | 0.892/0.876 | 0.171/0.158 | 3.22E-01              | 1.18 (0.86-1.65)       |
| rs11047543 | Chr12:24788339  | <i>SOX5,BCAT1</i>                        | G | A | 0.892/0.878 | 0.176/0.159 | 2.36E-01              | 1.21 (0.89-1.69)       |
| rs883079   | Chr12:114793240 | <i>TBX3,TBX5</i>                         | C | T | 0.542/0.548 | 0.356/0.280 | 8.64E-01              | 0.98 (0.8-1.2)         |
| rs3825214  | Chr12:114795443 | <i>TBX5</i>                              | G | A | 0.429/0.438 | 0.252/0.190 | 7.38E-01              | 0.97 (0.79-1.18)       |

|            |                 |                                                    |   |   |             |             |           |                        |
|------------|-----------------|----------------------------------------------------|---|---|-------------|-------------|-----------|------------------------|
| rs7312625  | Chr12:114799974 | <i>TBX3,TBX5</i>                                   | G | A | 0.172/0.186 | 0.338/0.264 | 4.78E-01  | 0.91 (0.69-1.18)       |
| rs1896312  | Chr12:115346424 | <i>TBX3,TBX5</i>                                   | C | T | 0.611/0.553 | 0.303/0.286 | 2.35E-02‡ | 1.27 (1.03-1.56)       |
| rs10850409 | Chr12:115381740 | <i>TBX3,TBX5</i>                                   | G | A | 0.382/0.441 | 0.278/0.269 | 2.69E-02‡ | 0.79 (0.64-0.97)       |
| rs885389   | Chr12:131621762 | <i>GPR133</i>                                      | A | G | 0.553/0.557 | 0.375/0.332 | 9.41E-01  | 0.99 (0.81-1.21)       |
| rs2478333  | Chr13:48162558  | <i>SUCLA2</i>                                      | C | A | 0.932/0.933 | 0.252/0.190 | 9.70E-01  | 0.99 (0.68-1.52)       |
| rs1886512  | Chr13:74520186  | <i>KLF12</i>                                       | T | A | 0.751/0.737 | 0.364/0.353 | 5.01E-01  | 1.08 (0.86-1.37)       |
| rs365990   | Chr14:23861811  | <i>MYH6,MYH7,N<br/>DNG,ZFHX2</i>                   | A | G | 0.834/0.825 | 0.363/0.378 | 6.10E-01  | 1.07 (0.82-1.42)       |
| rs223116   | Chr14:23977010  | <i>MYH6,MYH7,N<br/>DNG,ZFHX2</i>                   | A | G | 0.337/0.352 | 0.383/0.378 | 5.62E-01  | 0.94 (0.76-1.16)       |
| rs11848785 | Chr14:72057355  | <i>SIPA1LI</i>                                     | G | A | 0.082/0.088 | 0.265/0.253 | 6.68E-01  | 0.92 (0.62-1.31)       |
| rs8049607  | Chr16:11691753  | <i>LITAF,CLEC16<br/>A,SNN,ZC3H7A,<br/>TNFRSF16</i> | T | C | 0.411/0.41  | 0.296/0.270 | 9.69E-01  | 1 (0.82-1.23)          |
| rs37062    | Chr16:58567238  | <i>CNOT1,GINS3,<br/>SLC38A7,GOT1</i>               | A | G | 0.573/0.612 | 0.484/0.481 | 7.35E-02  | 0.83 (0.68-1.02)       |
| rs2074518  | Chr17:33324382  | <i>LIG3,RFFL</i>                                   | C | T | 0.732/0.704 | 0.260/0.239 | 2.07E-01  | 1.16 (0.93-1.46)       |
| rs17608766 | Chr17:45013271  | <i>GOSR2</i>                                       | T | C | 1/1         | 0.479/0.456 | 9.68E-01  | NA(0-Inf) <sup>†</sup> |
| rs9912468  | Chr17:64318357  | <i>PRKCA</i>                                       | G | C | 0.474/0.437 | 0.136/0.135 | 1.76E-01  | 1.15 (0.94-1.41)       |
| rs17779747 | Chr17:68494992  | <i>KCNJ2</i>                                       | G | T | 0.924/0.936 | 0.473/0.454 | 3.85E-01  | 0.84 (0.59-1.26)       |
| rs991014   | Chr18:42439886  | <i>SETBP1</i>                                      | C | T | 0.666/0.642 | 0.353/0.332 | 3.08E-01  | 1.12 (0.9-1.39)        |
| rs1805128  | Chr21:35821680  | <i>KCNE1</i>                                       | T | C | 0.003/0.004 | 0.405/0.403 | 7.06E-01  | 0.69 (0.04-3.03)       |

NA: only one genotype exists

\**P*-value was obtained by using logistic regression.

<sup>†</sup> Unable to estimate due to extremely imbalanced sample distributions

<sup>‡</sup> indicates statistical significance ( $p < 0.05$ ).

**Supplementary Table 7. Comparisons of the 88 previously reported SNPs between BrS patients with and without SCN5A mutations**

| SNPs (set 1) | Without SCN5A mutations |                        | With SCN5A mutations  |                        |
|--------------|-------------------------|------------------------|-----------------------|------------------------|
|              | P-value*                | OR                     | P-value*              | OR                     |
| rs11708996   | 2.66E-01                | 1.76 (0.54-4.22)       | 9.85E-01              | NA(0-Inf) <sup>‡</sup> |
| rs10428132   | 1.97E-06 <sup>†</sup>   | 1.79 (1.4-2.27)        | 6.68E-03 <sup>†</sup> | 2.16 (1.21-3.72)       |
| rs9388451    | 5.69E-04 <sup>†</sup>   | 1.66 (1.25-2.24)       | 6.57E-01              | 1.15 (0.64-2.22)       |
| SNPs (set 2) |                         |                        |                       |                        |
| rs6599240    | 3.79E-03 <sup>†</sup>   | 1.51 (1.13-1.97)       | 2.10E-01              | 1.53 (0.75-2.84)       |
| rs11129801   | 7.81E-05 <sup>†</sup>   | 1.53 (1.24-1.89)       | 3.68E-02 <sup>†</sup> | 1.73 (1.04-2.93)       |
| rs9874633    | 8.36E-01                | 0.97 (0.76-1.27)       | 6.32E-01              | 1.17 (0.64-2.37)       |
| rs10428132   | 1.97E-06 <sup>†</sup>   | 1.79 (1.4-2.27)        | 6.68E-03 <sup>†</sup> | 2.16 (1.21-3.72)       |
| rs7428167    | 2.69E-05 <sup>†</sup>   | 1.6 (1.28-1.99)        | 8.81E-03 <sup>†</sup> | 2.03 (1.2-3.48)        |
| rs10428168   | 7.45E-01                | 0.96 (0.77-1.22)       | 8.81E-01              | 1.04 (0.61-1.87)       |
| rs12638572   | 1.68E-06 <sup>†</sup>   | 1.78 (1.4-2.25)        | 1.47E-02 <sup>†</sup> | 2 (1.12-3.43)          |
| rs7641844    | 2.68E-06 <sup>†</sup>   | 1.7 (1.36-2.12)        | 9.60E-03 <sup>†</sup> | 2 (1.18-3.39)          |
| rs7430439    | 3.64E-06 <sup>†</sup>   | 1.69 (1.35-2.11)       | 1.41E-02 <sup>†</sup> | 1.94 (1.13-3.28)       |
| rs6599257    | 5.81E-07 <sup>†</sup>   | 1.96 (1.49-2.53)       | 2.51E-02 <sup>†</sup> | 2.04 (1.05-3.69)       |
| rs1268070    | 1.00E-02 <sup>†</sup>   | 1.49 (1.11-2.04)       | 4.21E-01              | 0.79 (0.45-1.47)       |
| rs9388451    | 5.69E-04 <sup>†</sup>   | 1.66 (1.25-2.24)       | 6.57E-01              | 1.15 (0.64-2.22)       |
| SNPs (set 3) |                         |                        |                       |                        |
| rs846111     | 3.51E-01                | 0.88 (0.67-1.17)       | 8.77E-01              | 1.06 (0.55-2.29)       |
| rs9436640    | 9.76E-01                | NA(0-Inf) <sup>‡</sup> | 9.86E-01              | NA(0-Inf) <sup>‡</sup> |
| rs4074536    | 6.36E-01                | 1.05 (0.85-1.31)       | 4.86E-01              | 0.83 (0.49-1.4)        |
| rs2880058    | NA                      | NA(0-Inf) <sup>‡</sup> | NA                    | NA(0-Inf) <sup>‡</sup> |
| rs12143842   | NA                      | NA(0-Inf) <sup>‡</sup> | NA                    | NA(0-Inf) <sup>‡</sup> |
| rs10494366   | NA                      | NA(0-Inf) <sup>‡</sup> | NA                    | NA(0-Inf) <sup>‡</sup> |
| rs16857031   | NA                      | NA(0-Inf) <sup>‡</sup> | NA                    | NA(0-Inf) <sup>‡</sup> |
| rs12029454   | 3.50E-01                | 1.13 (0.87-1.45)       | 4.99E-01              | 0.79 (0.38-1.5)        |
| rs4657178    | NA                      | NA(0-Inf) <sup>‡</sup> | NA                    | NA(0-Inf) <sup>‡</sup> |
| rs10919071   | NA                      | NA(0-Inf) <sup>‡</sup> | NA                    | NA(0-Inf) <sup>‡</sup> |
| rs12731740   | NA                      | NA(0-Inf) <sup>‡</sup> | NA                    | NA(0-Inf) <sup>‡</sup> |
| rs2745967    | NA                      | NA(0-Inf) <sup>‡</sup> | NA                    | NA(0-Inf) <sup>‡</sup> |
| rs17391905   | 2.62E-01                | 1.27 (0.81-1.89)       | 1.36E-01              | 1.91 (0.73-4.15)       |
| rs7562790    | 7.61E-01                | 1.04 (0.82-1.3)        | 5.54E-01              | 0.85 (0.48-1.45)       |
| rs17020136   | 2.72E-03 <sup>†</sup>   | 0.71 (0.57-0.89)       | 8.11E-01              | 1.07 (0.63-1.8)        |
| rs10865355   | 6.72E-03 <sup>†</sup>   | 1.44 (1.1-1.86)        | 7.92E-01              | 0.91 (0.42-1.77)       |
| rs11897119   | 3.99E-03 <sup>†</sup>   | 0.69 (0.54-0.89)       | 7.30E-01              | 1.13 (0.59-2.47)       |
| rs2051211    | 1.06E-01                | 1.23 (0.96-1.58)       | 5.92E-01              | 1.17 (0.67-2.18)       |
| rs10865879   | 1.27E-01                | 1.37 (0.94-2.1)        | 4.85E-01              | 1.42 (0.61-4.57)       |
| rs11129795   | 3.95E-15 <sup>†</sup>   | 3.9 (2.85-5.66)        | 1.06E-03 <sup>†</sup> | 3.77 (1.94-10.24)      |
| rs12053903   | 2.54E-01                | 0.88 (0.7-1.1)         | 3.23E-01              | 1.3 (0.77-2.2)         |



|            |                       |                        |                       |                        |
|------------|-----------------------|------------------------|-----------------------|------------------------|
| rs3922844  | 7.30E-01              | 1.07 (0.72-1.53)       | 3.83E-01              | 0.6 (0.15-1.61)        |
| rs11708996 | 3.85E-02 <sup>†</sup> | 0.49 (0.27-1.08)       | 9.83E-01              | NA(0-Inf) <sup>‡</sup> |
| rs6599222  | 9.68E-01              | NA(0-Inf) <sup>‡</sup> | 9.88E-01              | NA(0-Inf) <sup>‡</sup> |
| rs11710077 | 4.32E-01              | 1.22 (0.77-2.06)       | 7.69E-01              | 1.19 (0.44-4.86)       |
| rs9851724  | 5.06E-01              | 1.09 (0.84-1.39)       | 8.48E-01              | 0.94 (0.49-1.69)       |
| rs6795970  | 1.79E-07 <sup>†</sup> | 1.94 (1.51-2.48)       | 6.83E-03 <sup>†</sup> | 2.22 (1.21-3.89)       |
| rs6798015  | 1.54E-07 <sup>†</sup> | 1.88 (1.48-2.38)       | 5.98E-03 <sup>†</sup> | 2.17 (1.22-3.73)       |
| rs7627552  | NA                    | NA(0-Inf) <sup>‡</sup> | NA                    | NA(0-Inf) <sup>‡</sup> |
| rs4687718  | 6.02E-01              | 0.85 (0.42-1.5)        | 4.73E-01              | 0.49 (0.03-2.18)       |
| rs2242285  | 8.65E-01              | 1.03 (0.76-1.36)       | 8.04E-01              | 1.09 (0.52-2.07)       |
| rs7660702  | 9.93E-01              | 1 (0.65-1.46)          | 2.36E-01              | 0.43 (0.07-1.36)       |
| rs13165478 | 1.83E-01              | 1.16 (0.93-1.46)       | 7.68E-02              | 0.63 (0.37-1.05)       |
| rs251253   | 6.95E-01              | 1.06 (0.8-1.42)        | 2.11E-01              | 0.68 (0.38-1.29)       |
| rs1321311  | 1.98E-01              | 0.83 (0.63-1.11)       | 4.82E-01              | 0.79 (0.42-1.61)       |
| rs281868   | 2.19E-01              | 1.17 (0.91-1.52)       | 1.64E-01              | 1.6 (0.86-3.25)        |
| rs11153730 | NA                    | NA(0-Inf) <sup>‡</sup> | NA                    | NA(0-Inf) <sup>‡</sup> |
| rs11970286 | 8.75E-01              | 0.98 (0.76-1.25)       | 4.68E-01              | 0.79 (0.4-1.44)        |
| rs12210810 | 8.04E-02              | 1.24 (0.97-1.57)       | 3.53E-01              | 0.73 (0.35-1.36)       |
| rs11154022 | 1.31E-01              | 1.18 (0.95-1.48)       | 2.17E-01              | 1.4 (0.82-2.4)         |
| rs9398652  | 9.41E-01              | 1.01 (0.81-1.26)       | 1.74E-01              | 0.7 (0.41-1.17)        |
| rs1362212  | 4.91E-01              | 1.16 (0.78-1.84)       | 7.64E-01              | 0.87 (0.39-2.48)       |
| rs7784776  | 8.72E-01              | 1.02 (0.79-1.31)       | 4.61E-02 <sup>†</sup> | 0.45 (0.19-0.92)       |
| rs314370   | 1.92E-08 <sup>†</sup> | 2.48 (1.85-3.5)        | 5.68E-02              | 1.78 (1.05-3.57)       |
| rs3807989  | 3.19E-01              | 1.13 (0.88-1.45)       | 5.59E-01              | 0.83 (0.41-1.52)       |
| rs2968863  | 1.56E-01              | 1.72 (0.88-4)          | 5.18E-01              | 0.69 (0.26-2.78)       |
| rs4725982  | 3.88E-01              | 0.9 (0.72-1.13)        | 8.18E-01              | 0.94 (0.53-1.61)       |
| rs1733724  | 3.72E-01              | 1.23 (0.75-1.9)        | 9.83E-01              | NA(0-Inf) <sup>‡</sup> |
| rs7342028  | 2.82E-02 <sup>†</sup> | 0.78 (0.62-0.97)       | 8.42E-01              | 0.95 (0.56-1.6)        |
| rs2074238  | 8.65E-01              | 1.06 (0.48-2.03)       | 7.86E-01              | 0.76 (0.04-3.56)       |
| rs12296050 | 1.10E-01              | 1.21 (0.96-1.54)       | 2.11E-01              | 1.46 (0.83-2.71)       |
| rs12576239 | 2.60E-01              | 1.25 (0.86-1.9)        | 7.45E-01              | 1.16 (0.52-3.32)       |
| rs174547   | 1.60E-01              | 1.17 (0.94-1.46)       | 5.69E-01              | 1.17 (0.68-1.97)       |
| rs4944092  | 7.50E-01              | 0.96 (0.75-1.25)       | 7.79E-01              | 1.1 (0.6-2.17)         |
| rs17287293 | 8.28E-02              | 1.39 (0.97-2.07)       | 1.12E-01              | 0.59 (0.32-1.19)       |
| rs11047543 | 5.95E-02              | 1.43 (1-2.11)          | 1.46E-01              | 0.62 (0.34-1.24)       |
| rs883079   | 8.19E-01              | 0.97 (0.78-1.21)       | 9.16E-01              | 1.03 (0.61-1.75)       |
| rs3825214  | 9.78E-01              | 1 (0.8-1.25)           | 3.49E-01              | 0.77 (0.44-1.31)       |
| rs7312625  | 3.19E-01              | 0.86 (0.64-1.14)       | 5.81E-01              | 1.2 (0.61-2.18)        |
| rs1896312  | 1.46E-02 <sup>†</sup> | 1.32 (1.06-1.66)       | 9.81E-01              | 1.01 (0.6-1.71)        |
| rs10850409 | 1.95E-02 <sup>†</sup> | 0.76 (0.61-0.96)       | 8.80E-01              | 0.96 (0.56-1.62)       |
| rs885389   | 9.41E-01              | 0.99 (0.8-1.23)        | 9.88E-01              | 1 (0.59-1.69)          |
| rs2478333  | 6.60E-01              | 1.11 (0.72-1.8)        | 2.50E-01              | 0.61 (0.28-1.58)       |
| rs1886512  | 2.22E-01              | 1.17 (0.91-1.52)       | 2.37E-01              | 0.72 (0.42-1.27)       |
| rs365990   | 5.65E-01              | 1.09 (0.82-1.48)       | 9.58E-01              | 0.98 (0.52-2.06)       |
| rs223116   | 5.04E-01              | 0.92 (0.73-1.16)       | 9.24E-01              | 1.03 (0.58-1.76)       |

|            |                       |                        |                       |                        |
|------------|-----------------------|------------------------|-----------------------|------------------------|
| rs11848785 | 9.29E-01              | 0.98 (0.65-1.43)       | 3.69E-01              | 0.59 (0.14-1.6)        |
| rs8049607  | 4.51E-01              | 0.92 (0.73-1.15)       | 5.73E-02              | 1.67 (0.98-2.84)       |
| rs37062    | 2.95E-01              | 0.89 (0.71-1.11)       | 3.30E-02 <sup>†</sup> | 0.57 (0.33-0.95)       |
| rs2074518  | 2.52E-02 <sup>†</sup> | 1.34 (1.04-1.74)       | 3.68E-02 <sup>†</sup> | 0.57 (0.34-0.98)       |
| rs17608766 | 9.79E-01              | NA(0-Inf) <sup>‡</sup> | 9.88E-01              | NA(0-Inf) <sup>‡</sup> |
| rs9912468  | 3.38E-01              | 1.11 (0.89-1.38)       | 2.23E-01              | 1.38 (0.82-2.35)       |
| rs17779747 | 2.78E-01              | 0.8 (0.55-1.23)        | 7.26E-01              | 1.23 (0.45-5.05)       |
| rs991014   | 4.56E-01              | 1.09 (0.87-1.38)       | 3.85E-01              | 1.29 (0.74-2.33)       |
| rs1805128  | 9.71E-01              | NA(0-Inf) <sup>‡</sup> | 1.28E-01              | 4.52 (0.26-19.8)       |

SNP: single nucleotide polymorphism; OR, odds ratio

NA: only one genotype exists

\* *P*-value was obtained by using logistic regression;

<sup>†</sup> indicates statistical significance ( $p < 0.05$ ).

<sup>‡</sup> Unable to estimate due to extremely imbalanced sample distributions

## **Acknowledgements**

We are sincerely grateful to many cardiologists, including Dr. Shoei K. Stephen Huang, Dr. Tsu-Juey Wu, Dr. Shih-Ann Chen, Dr. Yenn-Jiang Lin, Dr. Chun-Chieh Wang, Dr. Chi-Tai Kuo, Dr. Yu-Feng Hu, Dr. Kwo-Chang Ueng, Dr. Hsuan-Ming Tsao, Dr. Kuan-Cheng Chang, Dr. Meng-Huan Lei, Dr. An-Ning Feng, Dr. Chi-Woon Kong, Dr. Wen-Chin Ko, Dr. Jin-Long Huang, Dr. Wen-Chin Tsai, Dr. Chin-Feng Tsai, Dr. Li-Wei Lo, Dr. Huey-Ming Lo, Dr. Meng-Cheng Chiang, Dr. Chun-Chieh Wang, Dr. Chih-Ping Hsia, Dr. Jen-Fu Liu, Dr. Shuenn-Nan Chiu, Dr. Mei-Hwan Wu, Dr. Ming-Tai Lin, Dr. Shuenn-Nan Chiu, Dr. Su-Kiat Chua and many other doctors in other medical centers or hospitals for referring patients to our hospital.

## Supplementary References

1. Wu CK, Juang JJ, Chiang JY, Li YH, Tsai CT, Chiang FT. The taiwan heart registries: Its influence on cardiovascular patient care. *J Am Coll Cardiol.* 2018;71:1273-1283
2. Priori SG, Wilde AA, Horie M, Cho Y, Behr ER, Berul C, Blom N, Brugada J, Chiang CE, Huikuri H, et al. Executive summary: Hrs/ehra/aphrs expert consensus statement on the diagnosis and management of patients with inherited primary arrhythmia syndromes. *Europace.* 2013;15:1389-1406
3. Fan CT, Lin JC, Lee C. Taiwan biobank: A project aiming to aid taiwan's transition into a biomedical island. *Pharmacogenomics.* 2008;9:235-246
4. Genomes Project C, Abecasis GR, Altshuler D, Auton A, Brooks LD, Durbin RM, Gibbs RA, Hurles ME, McVean GA. A map of human genome variation from population-scale sequencing. *Nature.* 2010;467:1061-1073
5. Genomes Project C, Abecasis GR, Auton A, Brooks LD, DePristo MA, Durbin RM, Handsaker RE, Kang HM, Marth GT, McVean GA. An integrated map of genetic variation from 1,092 human genomes. *Nature.* 2012;491:56-65
6. Purcell S, Neale B, Todd-Brown K, Thomas L, Ferreira MA, Bender D, Maller J, Sklar P, de Bakker PI, Daly MJ, et al. Plink: A tool set for whole-genome association and population-based linkage analyses. *Am J Hum Genet.* 2007;81:559-575
7. Delaneau O, Zagury JF, Marchini J. Improved whole-chromosome phasing for disease and population genetic studies. *Nature Methods.* 2013;10:5-6
8. Howie BN, Donnelly P, Marchini J. A flexible and accurate genotype imputation method for the next generation of genome-wide association studies. *Plos Genetics.* 2009;5
9. Bezzina CR, Barc J, Mizusawa Y, Remme CA, Gourraud JB, Simonet F, Verkerk AO, Schwartz PJ, Crotti L, Dagradi F, et al. Common variants at *scn5a-sc10a* and *hey2* are associated with brugada syndrome, a rare disease with high risk of sudden cardiac death. *Nat Genet.* 2013;45:1044-1049
10. Chambers JC, Zhao J, Terracciano CM, Bezzina CR, Zhang W, Kaba R, Navaratnarajah M, Lotlikar A, Sehmi JS, Kooner MK, et al. Genetic variation in *scn10a* influences cardiac conduction. *Nat Genet.* 2010;42:149-152
11. Holm H, Gudbjartsson DF, Arnar DO, Thorleifsson G, Thorgeirsson G, Stefansdottir H, Gudjonsson SA, Jonasdottir A, Mathiesen EB, Njolstad I, et al. Several common variants modulate heart rate, pr interval and qrs duration. *Nat Genet.* 2010;42:117-122
12. Pfeufer A, van Noord C, Marciante KD, Arking DE, Larson MG, Smith AV, Tarasov KV, Muller M, Sotoodehnia N, Sinner MF, et al. Genome-wide association study of pr interval. *Nat Genet.* 2010;42:153-159

13. Sotoodehnia N, Isaacs A, de Bakker PI, Dorr M, Newton-Cheh C, Nolte IM, van der Harst P, Muller M, Eijgelsheim M, Alonso A, et al. Common variants in 22 loci are associated with qrs duration and cardiac ventricular conduction. *Nat Genet.* 2010;42:1068-1076
14. Arking DE, Pfeufer A, Post W, Kao WH, Newton-Cheh C, Ikeda M, West K, Kashuk C, Akyol M, Perz S, et al. A common genetic variant in the nos1 regulator nos1ap modulates cardiac repolarization. *Nat Genet.* 2006;38:644-651
15. Newton-Cheh C, Eijgelsheim M, Rice KM, de Bakker PI, Yin X, Estrada K, Bis JC, Marciante K, Rivadeneira F, Noseworthy PA, et al. Common variants at ten loci influence qt interval duration in the qtgen study. *Nat Genet.* 2009;41:399-406
16. Pfeufer A, Sanna S, Arking DE, Muller M, Gateva V, Fuchsberger C, Ehret GB, Orru M, Pattaro C, Kottgen A, et al. Common variants at ten loci modulate the qt interval duration in the qtsd study. *Nat Genet.* 2009;41:407-414
17. Eijgelsheim M, Newton-Cheh C, Sotoodehnia N, de Bakker PI, Muller M, Morrison AC, Smith AV, Isaacs A, Sanna S, Dorr M, et al. Genome-wide association analysis identifies multiple loci related to resting heart rate. *Hum Mol Genet.* 2010;19:3885-3894
18. Marroni F, Pfeufer A, Aulchenko YS, Franklin CS, Isaacs A, Pichler I, Wild SH, Oostra BA, Wright AF, Campbell H, et al. A genome-wide association scan of rr and qt interval duration in 3 european genetically isolated populations: The eurosplan project. *Circ Cardiovasc Genet.* 2009;2:322-328
19. Delaneau O, Marchini J, Consortium GP. Integrating sequence and array data to create an improved 1000 genomes project haplotype reference panel. *Nature Communications.* 2014;5
20. Roshyara NR, Scholz M. Impact of genetic similarity on imputation accuracy. *Bmc Genetics.* 2015;16
21. Richards S, Aziz N, Bale S, Bick D, Das S, Gastier-Foster J, Grody WW, Hegde M, Lyon E, Spector E, et al. Standards and guidelines for the interpretation of sequence variants: A joint consensus recommendation of the american college of medical genetics and genomics and the association for molecular pathology. *Genet Med.* 2015;17:405-424
22. Bezzina CR, Barc J, Mizusawa Y, Remme CA, Gourraud JB, Simonet F, Verkerk AO, Schwartz PJ, Crotti L, Dagradi F, et al. Common variants at scn5a-sc10a and hey2 are associated with brugada syndrome, a rare disease with high risk of sudden cardiac death. *Nature Genetics.* 2013;45:1044-+
